# Supplementary material for: Levels of Complement Components in Children With Acute COVID-19 or Multisystem Inflammatory Syndrome
Source: PubMed Central journal article supplement (PMC10313152; doi:10.1001/jamanetworkopen.2023.1713), 2023-03-24
Supplement: jamanetwopen-e231713-s001.pdf [file jamanetwopen-e231713-s001.pdf]

## Supplemental Online Content

Rajamanickam A, Nathella PK, Venkataraman A, et al. Levels of complement components in children with acute COVID-19 or multi-system inflammatory syndrome. *JAMA Netw Open*. 2023;6(3):e231713.  
doi:10.1001/jamanetworkopen.2023.1713

**eFigure 1.** MIS-C and Acute COVID-19 Children Are Associated With Elevated Levels of Complement Activation

**eFigure 2.** Enhanced Complement Activation Is Associated With Disease Severity in MIS-C Children

**eFigure 3.** Enhanced Complement Activation Is Associated With Disease Severity in Acute COVID-19

**eFigure 4.** Correlation of Plasma Complement Components, Complement Regulators and Complement Activation Products With Laboratory Parameters and Pro-inflammatory Cytokines

**eTable 1.** Demographics and Haematology Parameters of the Study Population

**eTable 2.** Geo Mean and Fold Change of Complement Components of the Study Groups

**eTable 3.** Geo Mean and Fold Change of Complement Components Between PICU vs No PICU

**eTable 4.** Geo Mean and Fold Change of Complement Components Between Moderate/Severe Vs Mild

**eTable 5.** Geo Mean and Standard Deviation of Complement Activation Is Associated With Disease Severity in Acute COVID-19

**eTable 6.** Geo Mean and Standard Deviation of Complement Activation Is Associated With Disease Severity in Acute COVID-19

This supplemental material has been provided by the authors to give readers additional information about their work.

**eFigure 1. MIS-C and acute COVID-19 children are associated with elevated levels of complement activation**

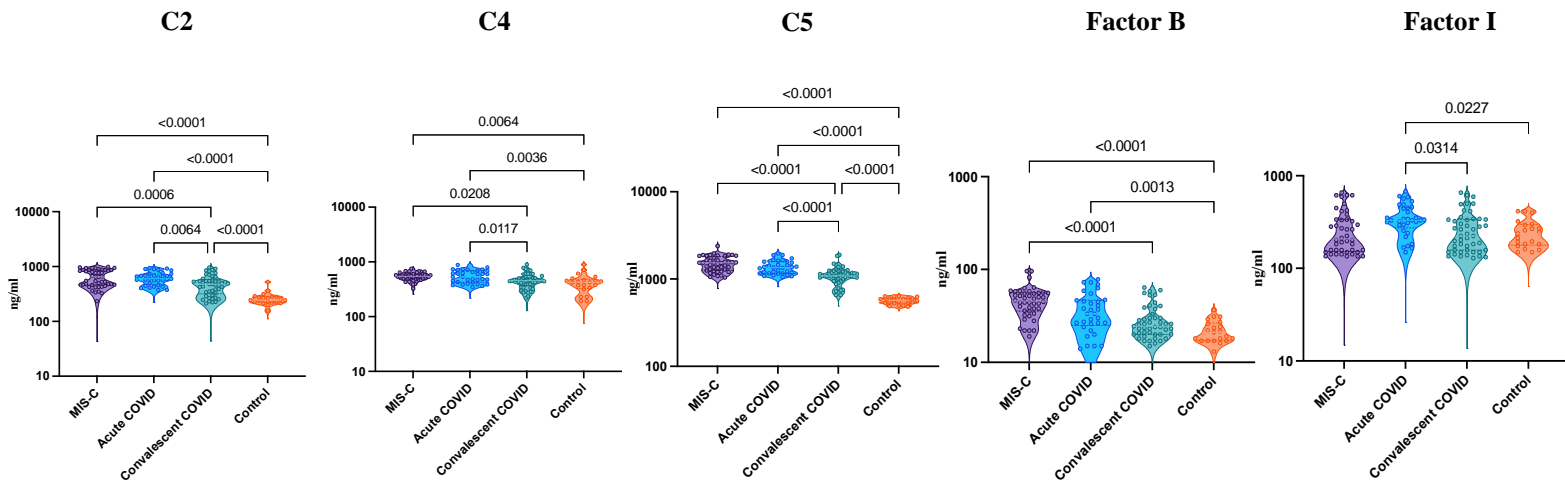

**eFigure.1.** Levels of the specified complement components, complement regulators and complement activation products C2, C4, C4b and MBL, C5, and iC3b, factor B, factor D, and factor I in plasma samples from MIS-C (n=44), Acute COVID-19 (n=33), convalescent COVID-19 (n=47) and control (n=21) children. The data are represented as scatter plots with each circle representing a single individual. P values were calculated using the Kruskal-Wallis test with Dunn’s post-hoc for multiple comparisons.

**eFigure 2. Enhanced complement activation is associated with disease severity in MIS-C children**

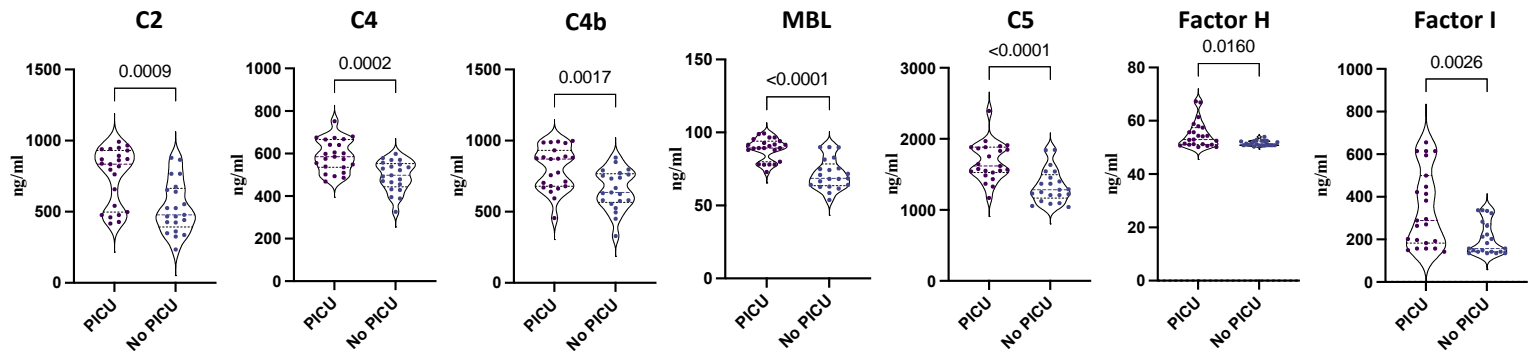

**eFigure.2.** Levels of the specified complement components, complement regulators and complement activation products C2, C4, C4b, MBL, C5, factor H and factor I were measured using plasma samples in children with MIS-C requiring PICU care (n = 23) and children in wards [who did not require PICU care] (n = 21). The data are represented as scatter plots with each circle representing a single individual. p values were calculated using the Mann-Whitney test with Holm's correction for multiple comparisons.

### eFigure 3. Enhanced complement activation is associated with disease severity in acute COVID-19

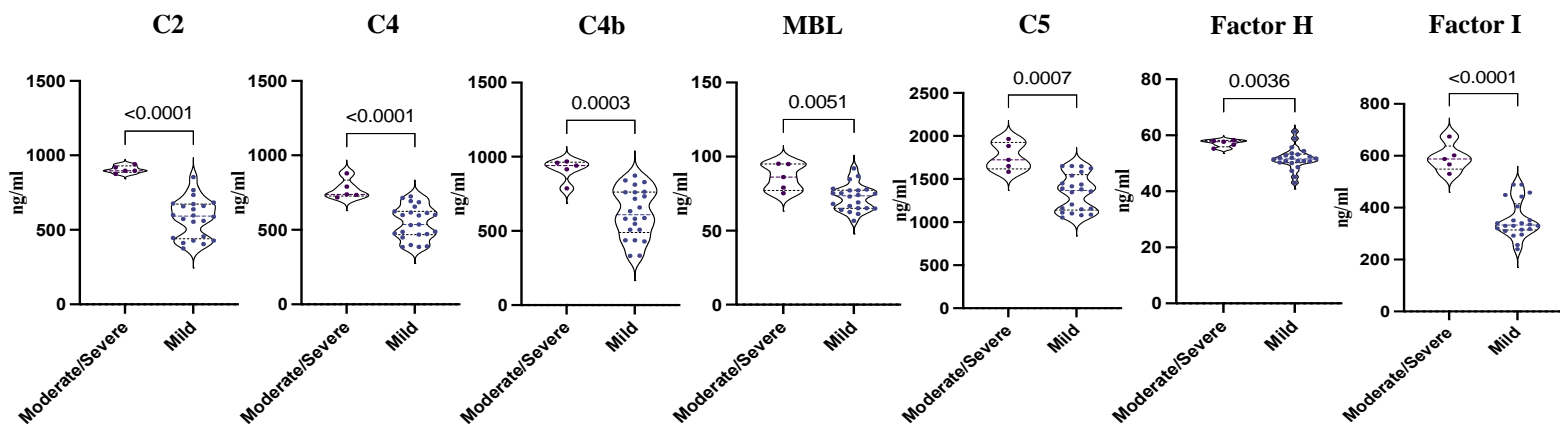

**eFigure 3.** Levels of the specified complement components, complement regulators and complement activation products C2, C4, C4b, MBL, C5, factor H and factor I were measured using plasma samples in children with moderate to severe (n = 5) COVID-19, and children with mild (n = 22) and asymptomatic (n = 5) COVID-19. The data are represented as scatter plots with each circle representing a single individual. P values were calculated using the Kruskal—Wallis test with Dunn’s post—hoc for multiple comparisons.

**eFigure 4. Correlation of plasma complement components, complement regulators and complement activation products with laboratory parameters and pro-inflammatory cytokines**

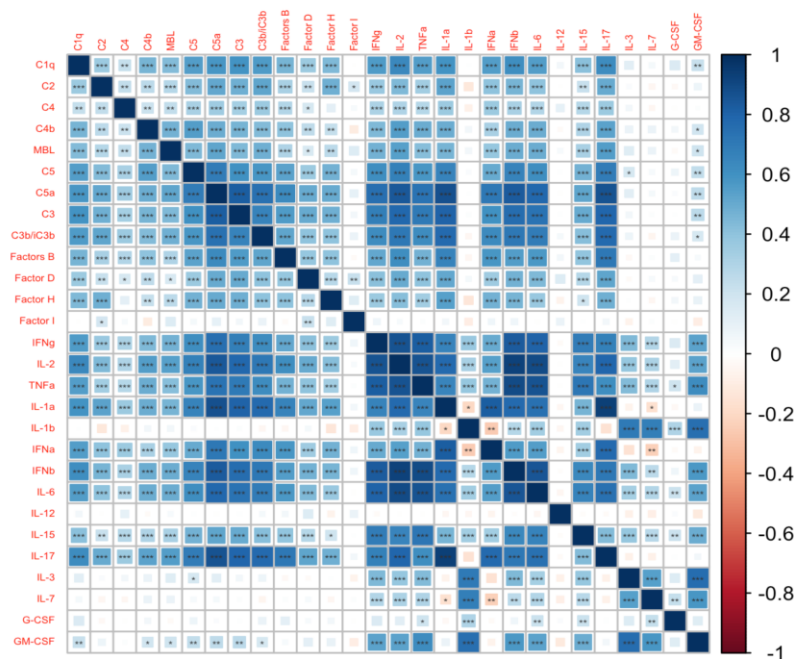

**eFigure.4.** Correlation between plasma levels of complement components (C1q, C2, C3, C4, C4b, MBL, C5), regulators (factor B, factor D, factor H and factor I) and activation products (iC3b, C5b) and pro-inflammatory cytokines (IFN $\gamma$ , IL-2, TNF $\alpha$ , IL1 $\alpha$ , IL1 $\beta$ , IFN $\alpha$ , IFN $\beta$ , IL-6, IL-12, IL-15, IL-17, IL-3, IL-7, G-CSF and GM-CSF) levels in all children with MIS-C, acute COVID-19, convalescent COVID-19 and control. Spearman's correlation method was used for the analysis. \* indicates p=0.05, \*\* indicates p= 0.01 and \*\*\* indicates p=0.001 the blue colour denotes the positive correlation and the red colour denotes the negative correlation.

**eTable 1. Demographics and haematology parameters of the study population**

|                                                                     | <b>MIS-C<br/>n = 44</b> | <b>Acute COVID-19<br/>n = 29</b> | <b>Convalescent<br/>COVID-19<br/>n = 47</b> | <b>Controls<br/>n=21</b> |
|---------------------------------------------------------------------|-------------------------|----------------------------------|---------------------------------------------|--------------------------|
| <b>Age median (years, IQR)</b>                                      | 7 y (1 – 14y)           | 5 (1 – 17 yr)                    | 4.4 y (1 – 17 y)                            | 6 y, (1 – 15 y)          |
| <b>Male n (%)</b>                                                   | 19 (43%)                | 20 (60%)                         | 35 (74%)                                    | 11 (52%)                 |
| <b>Female n (%)</b>                                                 | 25 (57%)                | 9 (40%)                          | 12 (26%)                                    | 10 (48%)                 |
| <b>Serology IgG positive n (%)</b>                                  | 44 (100%)               | 0                                | 47 (100%)                                   | 0                        |
| <b>CRP mean (&lt; 5 mg/L)</b>                                       | 169 (39 – 473)          | 5 (<5 – 181)                     | 5 (<5 – 181)                                | NA                       |
| <b>Lymphocyte(/mm<sup>3</sup>)<br/>(1500 – 4000) median (IQR)</b>   | 1386 (330 - 2200)       | 2945 (650 – 12000)               | 3890 (650 – 12000)                          | 3200 (2600 – 4000)       |
| <b>Neutrophils (/mm<sup>3</sup>)<br/>(1500 – 7000) median (IQR)</b> | 11658 (9918 - 14878)    | 3681 (120 – 13160)               | 6300 (120 – 13160)                          | 4500 (3500 – 6500)       |
| <b>Platelets (200 – 450)x10<sup>9</sup>/L<br/>median (IQR)</b>      | 110 (62 – 210)          | 278 (180 – 400)                  | 327 (100 – 540)                             | 350 (350 -450)           |
| <b>Sodium (135 – 145mmol/l)<br/>median (IQR)</b>                    | 134 (127 -138)          | 136 (135 – 145)                  | 138 (135 – 148)                             | 139 (135 – 145)          |
| <b>D-Dimer(100–500ng/ml<br/>FEU) median (IQR)</b>                   | 4890 (2446–10 000)      | NA                               | NA                                          | NA                       |
| <b>Ferritin (7 to 140ng/mL)<br/>median (IQR)</b>                    | 605 (38–2571)           | NA                               | NA                                          | NA                       |
| <b>LDH (125–243U/L) median<br/>(IQR)</b>                            | 494 (200–905)           | NA                               | NA                                          | NA                       |

**eTable 2. Geo Mean and Fold change of complement components of the study groups**

| <b>Parameters</b> | <b>MIS-C<br/>Geo Mean<br/>ng/ml</b> | <b>Acute<br/>COVID-19<br/>Geo Mean<br/>ng/ml</b> | <b>Convalescent<br/>COVID-19<br/>Geo Mean<br/>ng/ml</b> | <b>Control<br/>Geo Mean<br/>ng/ml</b> | <b>Acute<br/>COVID-<br/>19<br/>Fold<br/>change</b> | <b>Convalescent<br/>COVID-19<br/>Fold change</b> | <b>Control<br/>Fold<br/>change</b> |
|-------------------|-------------------------------------|--------------------------------------------------|---------------------------------------------------------|---------------------------------------|----------------------------------------------------|--------------------------------------------------|------------------------------------|
| <b>C1q</b>        | 61.48                               | 56.92                                            | 41.57                                                   | 24.14                                 | 1.1                                                | 1.5                                              | 2.5                                |
| <b>C2</b>         | 605.8                               | 606.4                                            | 448.1                                                   | 255.9                                 | 1.0                                                | 1.4                                              | 2.4                                |
| <b>C4</b>         | 537.4                               | 539.1                                            | 441.8                                                   | 396.9                                 | 1.0                                                | 1.2                                              | 1.4                                |
| <b>C4b</b>        | 712.4                               | 640.7                                            | 562.3                                                   | 351.5                                 | 1.1                                                | 1.3                                              | 2.0                                |
| <b>MBL</b>        | 79.42                               | 69.56                                            | 65.02                                                   | 49.32                                 | 1.1                                                | 1.2                                              | 1.6                                |
| <b>C5</b>         | 1487                                | 1364                                             | 1076                                                    | 561.9                                 | 1.1                                                | 1.4                                              | 2.6                                |
| <b>C5a</b>        | 2614                                | 1826                                             | 886                                                     | 462.5                                 | 1.4                                                | 3.0                                              | 5.7                                |
| <b>C3</b>         | 318.2                               | 237.7                                            | 161.1                                                   | 123.4                                 | 1.3                                                | 2.0                                              | 2.6                                |
| <b>C3b/iC3b</b>   | 3971                                | 3702                                             | 2646                                                    | 2039                                  | 1.1                                                | 1.5                                              | 1.9                                |
| <b>Factor B</b>   | 47.62                               | 44.58                                            | 36.64                                                   | 27.53                                 | 1.1                                                | 1.3                                              | 1.7                                |
| <b>Factor D</b>   | 43.95                               | 33.84                                            | 26.89                                                   | 21.28                                 | 1.3                                                | 1.6                                              | 2.1                                |
| <b>Factor H</b>   | 53.11                               | 50.82                                            | 47.23                                                   | 43.62                                 | 1.0                                                | 1.1                                              | 1.2                                |
| <b>Factor I</b>   | 242.4                               | 332.7                                            | 242                                                     | 233.9                                 | 0.7                                                | 1.0                                              | 1.0                                |

**eTable 3. Geo Mean and Fold Change of Complement Components Between PICU vs No PICU**

| <b>Parameters</b> | <b>PICU<br/>Geo Mean ng/ml</b> | <b>No PICU<br/>Geo Mean ng/ml</b> | <b>Fold<br/>change</b> |
|-------------------|--------------------------------|-----------------------------------|------------------------|
| <b>C1q</b>        | 72.31                          | 51.47                             | 1.4                    |
| <b>C2</b>         | 718.9                          | 502.2                             | 1.4                    |
| <b>C4</b>         | 585.7                          | 489                               | 1.2                    |
| <b>C4b</b>        | 788.6                          | 637.4                             | 1.2                    |
| <b>MBL</b>        | 88.26                          | 70.75                             | 1.2                    |
| <b>C5</b>         | 1659                           | 1320                              | 1.3                    |
| <b>C5a</b>        | 2806                           | 2418                              | 1.2                    |
| <b>C3</b>         | 341.1                          | 294.9                             | 1.2                    |
| <b>C3b/iC3b</b>   | 4247                           | 3690                              | 1.2                    |
| <b>Factor B</b>   | 52.02                          | 43.22                             | 1.2                    |
| <b>Factor D</b>   | 54.44                          | 34.77                             | 1.6                    |
| <b>Factor H</b>   | 54.58                          | 51.54                             | 1.1                    |
| <b>Factor I</b>   | 300.2                          | 191.7                             | 1.6                    |



**eTable 4. Geo Mean and Fold change of complement components between Moderate/Severe Vs Mild**

| <b>Fig.3</b>    | <b>Moderate/Severe</b> | <b>Mild</b> | <b>Fold change</b> |
|-----------------|------------------------|-------------|--------------------|
| <b>C1q</b>      | 89.44                  | 54.71       | 1.6                |
| <b>C2</b>       | 905.8                  | 565.8       | 1.6                |
| <b>C4</b>       | 770                    | 536.4       | 1.4                |
| <b>C4b</b>      | 911.5                  | 597.9       | 1.5                |
| <b>MBL</b>      | 85.75                  | 71.78       | 1.2                |
| <b>C5</b>       | 1756                   | 1329        | 1.3                |
| <b>C5a</b>      | 2608                   | 1845        | 1.4                |
| <b>C3</b>       | 311.8                  | 229.3       | 1.4                |
| <b>C3b/iC3b</b> | 4450                   | 3597        | 1.2                |
| <b>Factor B</b> | 52.71                  | 44          | 1.2                |
| <b>Factor D</b> | 71.01                  | 33.55       | 2.1                |
| <b>Factor H</b> | 57.16                  | 51.54       | 1.1                |
| <b>Factor I</b> | 590.5                  | 347.7       | 1.7                |

**eTable 5. Geo Mean and Standard deviation of complement activation is associated with disease severity in acute COVID-19.**

| <b>eFig.3</b>   | <b>Moderate/Severe<br/>GM and SD</b> | <b>Mild</b>    | <b>p value</b> |
|-----------------|--------------------------------------|----------------|----------------|
| <b>C2</b>       | 905.8 [131.0]                        | 565.8 [24.6]   | <0.0001        |
| <b>C4</b>       | 770 [110.5]                          | 536.4 [65.8]   | <0.0001        |
| <b>C4b</b>      | 911.5 [166.3]                        | 597.9 [74.0]   | 0.0003         |
| <b>MBL</b>      | 85.8 [8.8]                           | 71.8 [9.0]     | 0.0051         |
| <b>C5</b>       | 1756.0 [159.4]                       | 1329.0 [212.1] | 0.0007         |
| <b>Factor H</b> | 57.2 [4.0]                           | 51.5 [1.3]     | 0.0036         |
| <b>Factor I</b> | 590.5 [70.7]                         | 347.7 [53.0]   | <0.0001        |

**eTable.6. Geo Mean and Standard deviation of complement activation is associated with disease severity in acute COVID-19.**

| <b>Fig.4</b>    | <b>Moderate/Severe<br/>GM and SD</b> | <b>Mild</b>    | <b>p value</b> |
|-----------------|--------------------------------------|----------------|----------------|
| <b>C1q</b>      | 89.4 [14.0]                          | 54.7 [8.0]     | <0.0001        |
| <b>C3</b>       | 311.8 [65.3]                         | 229.3 [51.8]   | 0.0121         |
| <b>C3b/iC3b</b> | 4450.0 [692.5]                       | 3597.0 [327.1] | 0.0152         |
| <b>C5a</b>      | 2608.0 [420.8]                       | 1845.0 [128.8] | 0.0002         |
| <b>Factor B</b> | 52.7 [5.3]                           | 44.0 [4.0]     | 0.0034         |
| <b>Factor D</b> | 71.0 [11.5]                          | 33.6 [5.7]     | <0.0001        |
