# Supplementary material for: Levels of Complement Components in Children With Acute COVID-19 or Multisystem Inflammatory Syndrome
Source: PubMed Central journal article supplement (PMC10313152; doi:10.1001/jamanetworkopen.2023.1713), 2023-03-24
Supplement: jamanetwopen-e231713-s002.pdf [file jamanetwopen-e231713-s002.pdf]

## Data Sharing Statement

Rajamanickam. Levels of Complement Components in Children With Acute COVID-19 or Multisystem Inflammatory Syndrome. *JAMA Netw Open*. Published March 06, 2023.  
doi:10.1001/jamanetworkopen.2023.1713

### Data

**Data available:** No

### Additional Information

**Explanation for why data not available:** All the reported data are available within the manuscript
